# Supplementary material for: Inverse probability of treatment-weighted competing risks analysis: an application on long-term risk of urinary adverse events after prostate cancer treatments
Source: PubMed Central journal article supplement (PMC5504854; doi:10.1186/s12874-017-0367-8), 2017-07-10
Supplement: 12874_2017_367_MOESM1_ESM.pdf [file 12874_2017_367_MOESM1_ESM.pdf]

## Appendix A: The Estimation of Cumulative Incidence Function

Let us consider a competing risk time-to-event study with  $N$  independent observations concerning the situation where multiple causes of failure ( $K$ ) are possible. Let  $w_i$  be the inverse probability (IP) weight for the  $i^{\text{th}}$  subject ( $i = 1, 2, \dots, N$ ). Let  $0 < t_1 < t_2 < \dots < t_j$  denote the ordered distinct event time points at which failures of any cause occur. Let  $d_{kj}$  denote the number of patients failing from cause  $k$  ( $k = 1, 2, \dots, K$ ) at  $t_j$  and  $R_{kj}$  be the corresponding set of individuals. Let  $d_j = \sum_{k=1}^K d_{kj}$  denote the total number of failures from any cause. Let  $n_j$  be the number of individuals at risk at time  $t_j$  and  $R_j$  be the corresponding set of individuals. Thus, the weighted number of events failing from cause  $k$  is  $d_{kj}^W = \sum_{i \in R_{kj}} w_i$ , the weighted total number of failures from any cause is  $d_j^W = \sum_{k=1}^K d_{kj}^W$ , and the weighted number of individuals at risk is  $n_j^W = \sum_{i \in R_j} w_i$  at time  $t_j$ .

The overall unweighted survival probability  $S(x)$ , can be estimated by the Kaplan-Meier estimator as  $\hat{S}(x) = \prod_{j: t_j \leq x} \left(1 - \frac{d_j}{n_j}\right) = \prod_{j: t_j \leq x} \left(1 - \sum_{k=1}^K \widehat{\lambda}_k(t_j)\right)$ , where the unweighted cause specific hazard function  $\widehat{\lambda}_k(t_j) = d_{kj}/n_j$ . The unweighted cumulative incidence  $I_k(x)$  of cause  $k$  at time  $x$  is estimated  $\widehat{I}_k(x) = \sum_{j: t_j \leq x} \widehat{\lambda}_k(t_j) \hat{S}(t_{j-1})$ .

The overall inverse probability of treatment (IPT)-weighted survival probability  $S^W(x)$ , can be estimated by the weighted Kaplan-Meier estimator as  $\widehat{S}^W(x) = \prod_{j: t_j \leq x} \left(1 - \frac{d_j^W}{n_j^W}\right) = \prod_{j: t_j \leq x} \left(1 - \sum_{k=1}^K \widehat{\lambda}_k^W(t_j)\right)$ , where the IPT-weighted cause specific hazard function  $\widehat{\lambda}_k^W(t_j) = d_{kj}^W/n_j^W$ . The weighted cumulative incidence  $I_k^W(x)$  of cause  $k$  at time  $x$  is estimated  $\widehat{I}_k^W(x) = \sum_{j: t_j \leq x} \widehat{\lambda}_k^W(t_j) \widehat{S}^W(t_{j-1})$ .
