# Supplementary material for: Inverse probability of treatment-weighted competing risks analysis: an application on long-term risk of urinary adverse events after prostate cancer treatments
Source: PubMed Central journal article supplement (PMC5504854; doi:10.1186/s12874-017-0367-8), 2017-07-10
Supplement: 12874_2017_367_MOESM3_ESM.pdf [file 12874_2017_367_MOESM3_ESM.pdf]

## Appendix C: SAS Code

### C.1 SAS Code for the Hypothetical Example Calculations of Competing Risks and KM Cumulative Incidence Estimations of UAE:

\*Table 3: Unweighted KM versus unweighted CIF;

\*Table 4: Weighted KM versus weighted CIF;

\*Dataset of 10 patients;

\*The variable Ftime represents the disease-free survival in months, which is the time to UAE, time to death, or censored;

\*The variable Status is an indicator with the value 0 for censoring, 1 for UAE, or 2 for death during remission;

\*Dataset for Table 3 and 4;

**data** prostate\_cancer;

**input** PatientID \$ Ftime Event \$ At\_Risk CR\_UAE KM\_UAE Weight;

**datalines**;

1 10 UAE 10 1 1 0.9

2 15 Death 9 2 0 1

3 20 UAE 8 1 1 0.7

4 30 UAE 7 1 1 1.4

5 35 Alive 6 0 0 0.8

6 45 Death 5 2 0 0.5

7 50 UAE 4 1 1 1.1

8 55 Death 3 2 0 0.6

9 75 UAE 2 1 1 1.2

10 90 Alive 1 0 0 1.5

;

\*Un-weighted Competing Risks Method;

\*With event=1 for UAE;

**PROC PHREG DATA**=prostate\_cancer **plots**=cif **COVS**(AGGREGATE);

**MODEL** Ftime\*CR\_UAE(0)= / **eventcode**=1;

**BASELINE OUT**=out\_CRNW **CIF**=\_ALL\_;

**RUN**;

\*Un-weighted KM Method;

**PROC LIFETEST DATA**=prostate\_cancer **outsurv**=out\_KMNW **plots**=survival(failure);

**Time** Ftime\*KM\_UAE(0);

**title** 'KM Method for Unweighted Data';

**RUN**;

**DATA** out\_KMNW;

**SET** out\_KMNW;

failure = 1-SURVIVAL;

**RUN**;

```

*Weighted KM Method;
PROC LIFETEST DATA=prostate_cancer outsurv=out_KMW;
TIME Ftime*KM_UAE(0);
Weight Weight;
title "KM Method for Weighted Data";
RUN;
DATA out_KMW;
SET out_KMW;
failure = 1-SURVIVAL;
RUN;

```

```

*Weighted Competing Risks Method;
PROC PHREG DATA=prostate_cancer plots=cif COVS(AGGREGATE);
MODEL Ftime*CR_UAE(0) = / eventcode=1;
BASELINE OUT=out_CRW CIF=_ALL_;
Weight Weight;
RUN;

```

## C.2 SAS Code for IPT-Weighted and Un-Weighted Competing Risks Analysis:

\*Un-weighted competing risks method only adjusted for treatment group;

```

proc phreg data=prostate_uae_edit COVS(AGGREGATE);
  class txgroup (order=internal ref='control');
  model daystoevent*censor2(2) = txgroup / eventcode=0;
  Hazardratio 'Pairwise' txgroup / diff=pairwise;
  baseline out=out_unweightedCRadju;
run;

```

\*IPT-weighted CR Method only adjusted for treatment group;

```

proc phreg data=prostate_uae_edit COVS(AGGREGATE);
  class txgroup (order=internal ref='control');
  model daystoevent*censor2(2) = txgroup / eventcode=0;
  Hazardratio 'Pairwise' txgroup / diff=pairwise;
  baseline out=out_weightCRadju;
  weight ipw_st;
run;

```

\*Subset data by treatment group and run unadjusted competing risks model to calculate CIF;

\*Example of one treatment group = brybeam;

\*brybeam CIF unweighted;

```

proc phreg data=brybeam COVS(AGGREGATE);
  model daystoevent*censor2(2) = / eventcode=0;
  baseline out=out_unweightCR_brybeam cif=cif;
run;

```

```
*brybeam CIF IPT-weighted;  
proc phreg data=brybeam COVS(AGGREGATE);  
  model daystoevent*censor2(2) = / eventcode=0;  
  baseline out=out_weightCR_brybeam cif=cif;  
  weight ipw_st;  
run;
```
